# Supplementary material for: Capture and elimination of Staphylococcus aureus based on Langmuir–Blodgett MnO2 nanowire monolayer promotes infected wound healing
Source: Royal Society of Chemistry journal article supplement (doi:10.1039/c9tb00394k), 2019-01-01
Supplement: c9tb00394k1.pdf [file c9tb00394k1.pdf]

## Supporting Information

### Capture and Elimination *Staphylococcus aureus* based on Langmuir-Blodgett MnO<sub>2</sub> Nanowire Monolayer promote infected wound healing

Bolei Chen, Fang Ji, Chang Wang, Yue Gao, Zhen Zhou, Zhi Li, Huiming Cao, LitengHao, Guangliang Liu, Jingfu Liu, Yong Liang\*

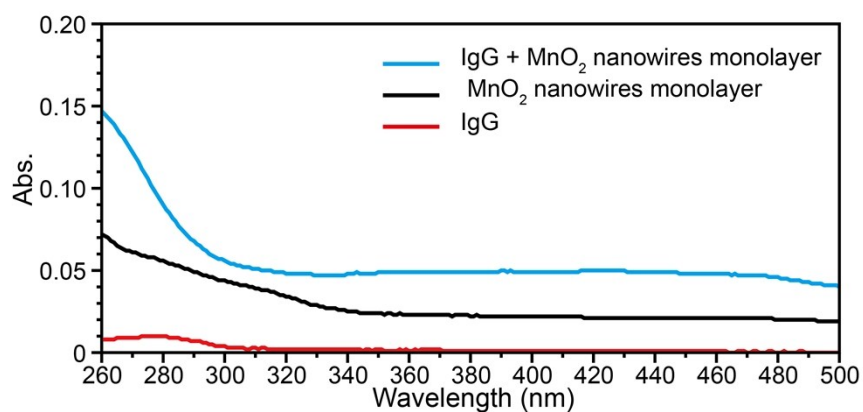

**Figure S1.** The UV-vis spectra of pure IgG, manganese dioxide nanowires monolayer and IgG modified manganese dioxide nanowires monolayer.

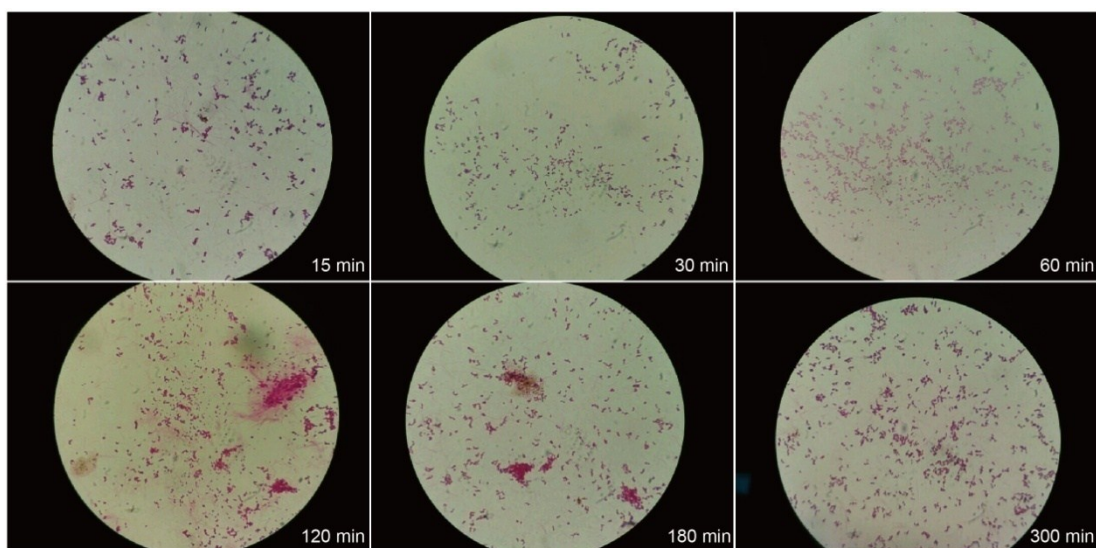

**Figure S2.** Typical optical microscopy images of the Gram stained bacteria captured by  $\text{MnO}_2$  substrate.

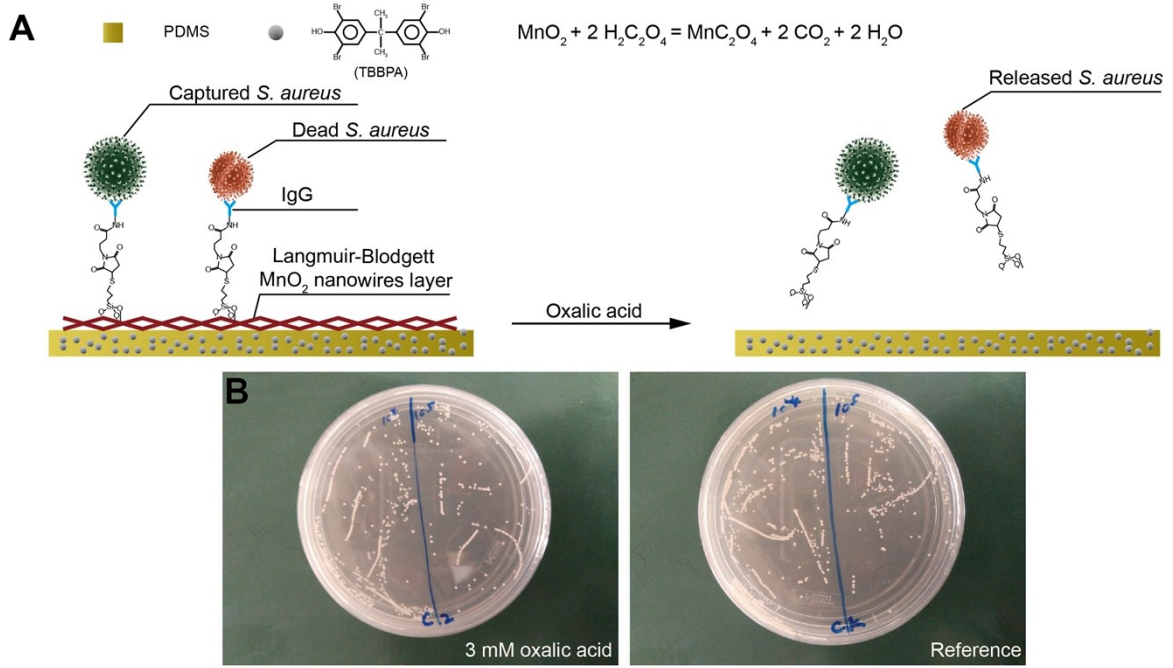

**Figure S3.** (A) Schematic design of  $\text{MnO}_2$ -sacrificed method to break the interaction between the immobilized bacteria and  $\text{MnO}_2$  nanowires monolayer. (B) The corresponding bacteria plate counting results for correlation between concentration of oxalic acid and bacteria viability.

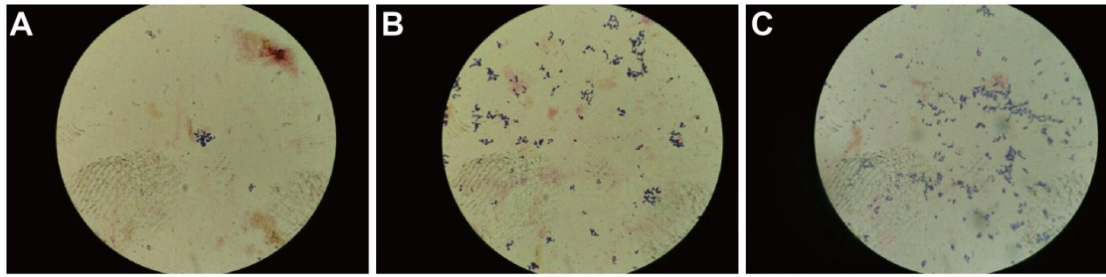

**Figure S4.** (A) The corresponding optical microscopy image of bacteria captured at concentration of  $100 \text{ mL}^{-1}$  (bacteria number per mL). (B) The corresponding optical microscopy image of bacteria captured at concentration of  $1000 \text{ mL}^{-1}$  (bacteria number per mL). (C) The corresponding optical microscopy image of bacteria captured at concentration of  $100 \text{ mL}^{-1}$  (bacteria number per mL).

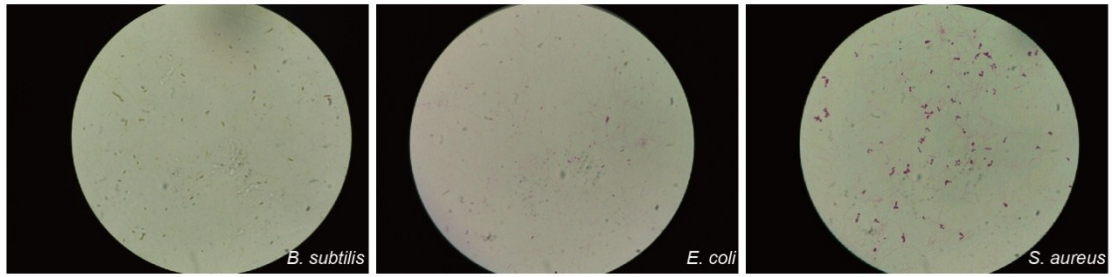

**Figure S5.** The corresponding optical images of selectivity for bacteria including *B. subtilis*, *E. coli*, and *S. aureus*.

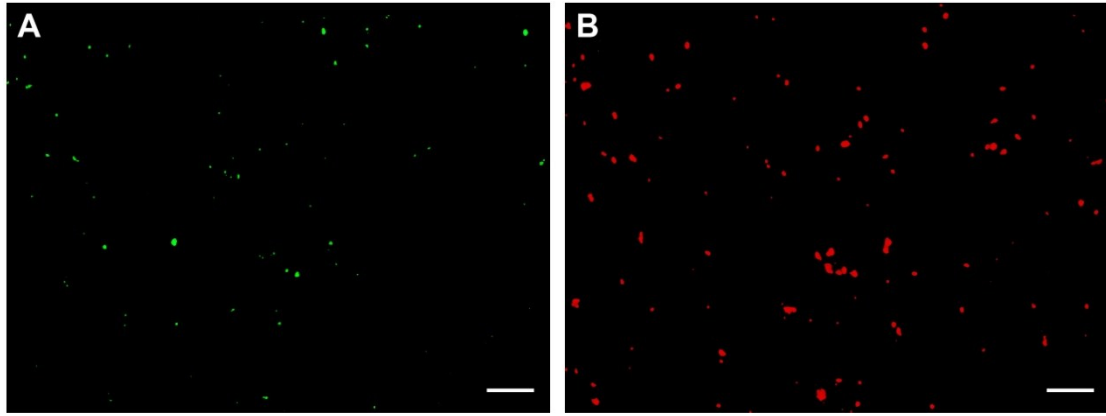

**Figure S6.** The contrast fluorescence images of bacteria captured on TBBPA embedded PDMS membrane without  $\text{MnO}_2$  nanowire monolayer and corresponding IgG surface modification (Green: total bacteria, Red: dead bacteria).

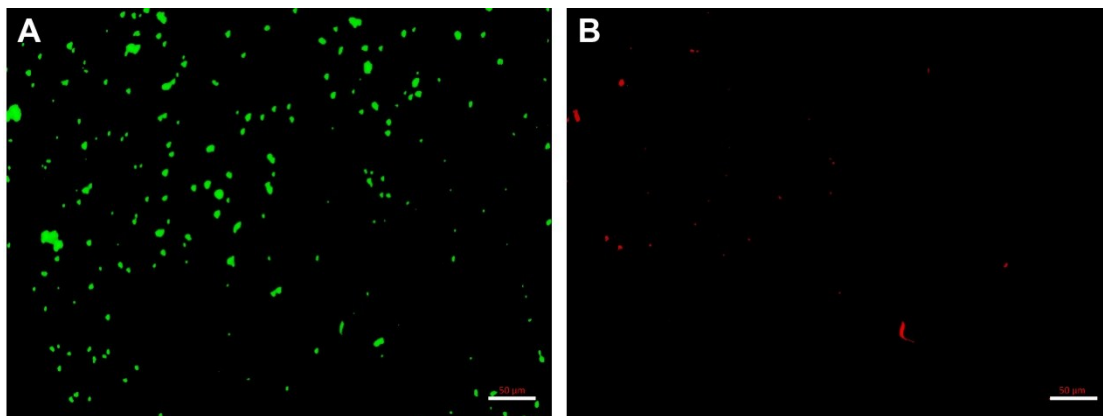

**Figure S7.** The contrast fluorescence images of bacteria captured on bare PDMS membrane without TBBPA,  $\text{MnO}_2$  nanowire monolayer and corresponding IgG surface modification (Green: total bacteria, Red: dead bacteria).



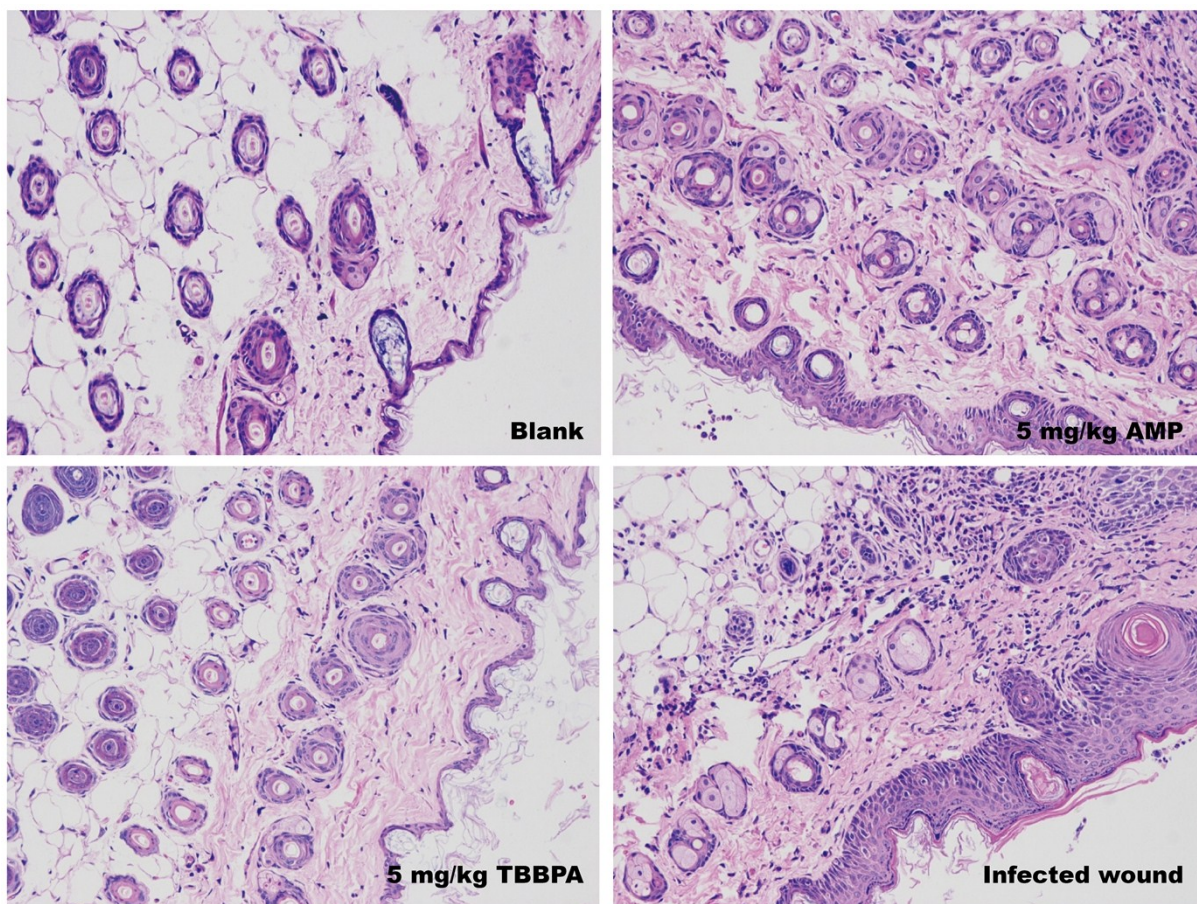

**Figure S8.** Histopathological examination of mouse wound surface, Hematoxylin-eosin staining, x200 magnification.
